# Supplementary material for: A proximal-to-distal survey of healthy adult human small intestine and colon epithelium by single-cell transcriptomics
Source: bioRxiv or medRxiv preprint supplement (doi:10.1101/2021.10.05.460818), 2021-10-06

Supplemental Figure  
Receptor Families by Cell Lineage

# Voltage-Gated Ion Channels

## High Expression (>0.5)

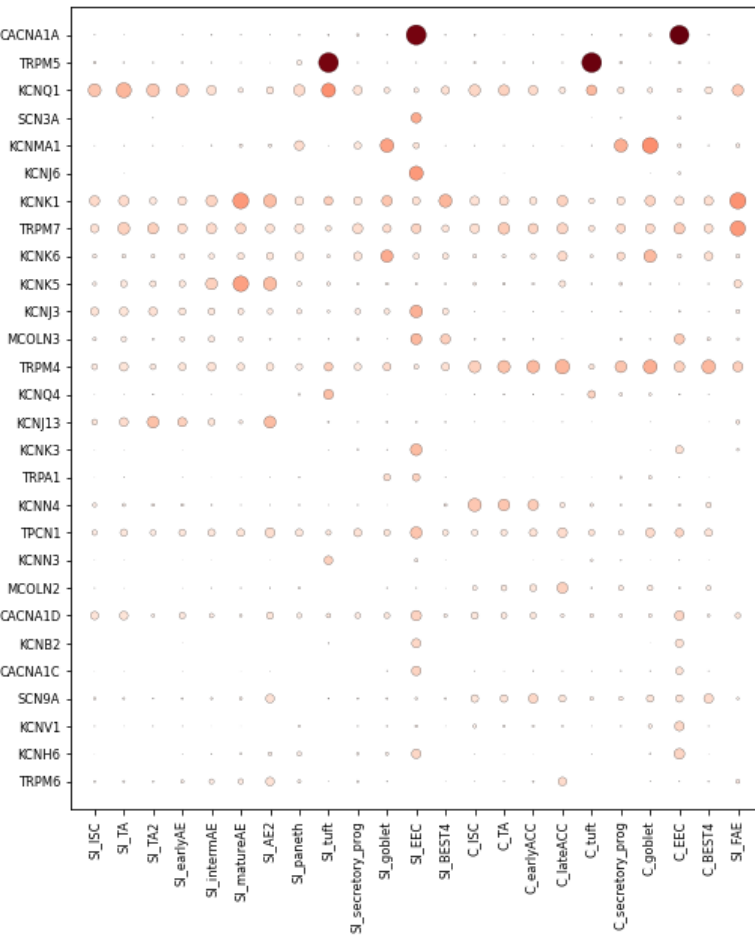

## Mid Expression (0.05 - 0.5)

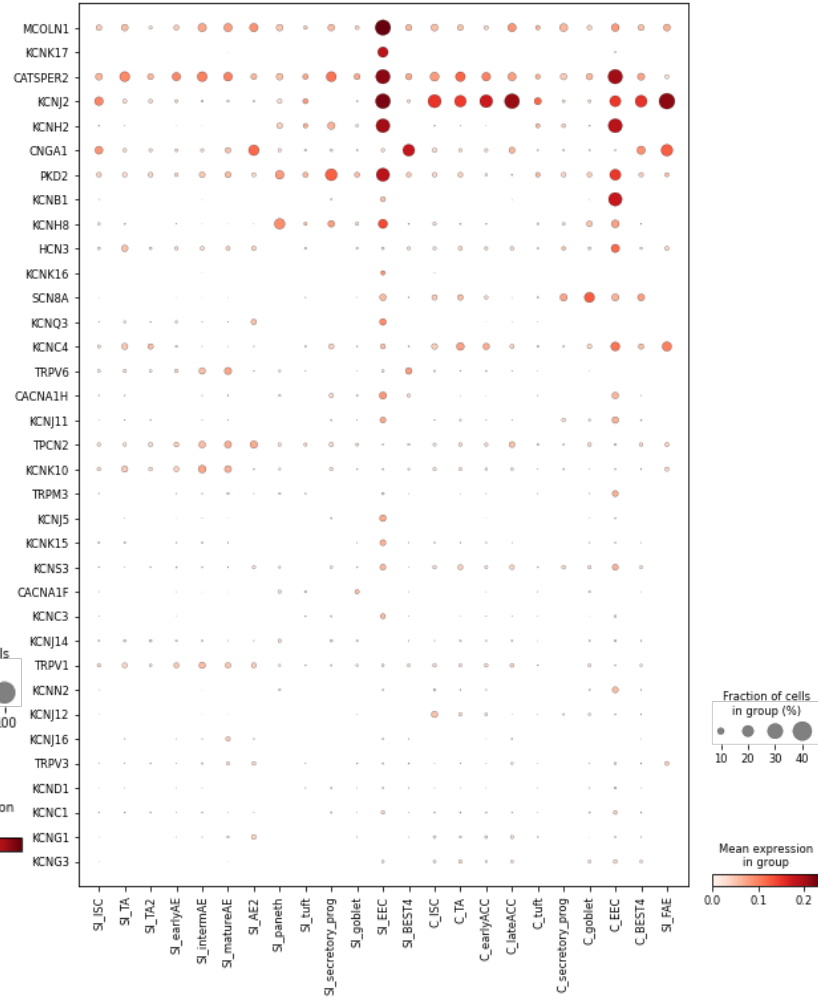

## Low Expression (<0.05)

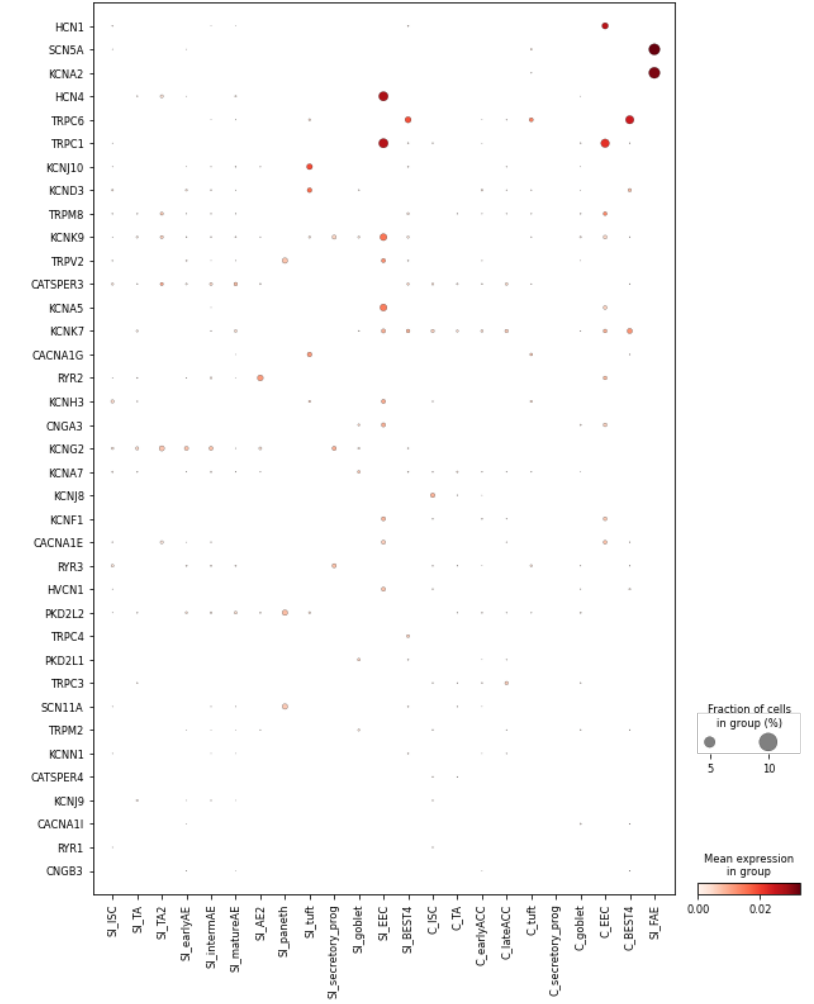

# Ligand-Gated Ion Channels

## High Expression (>0.5)

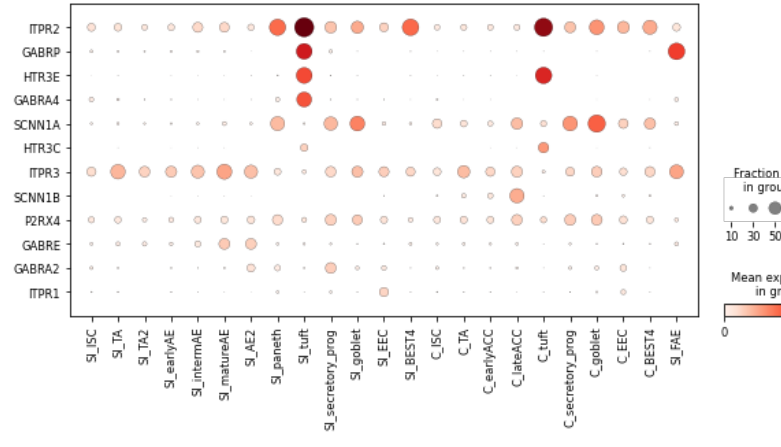

## Mid Expression (0.05 - 0.5)

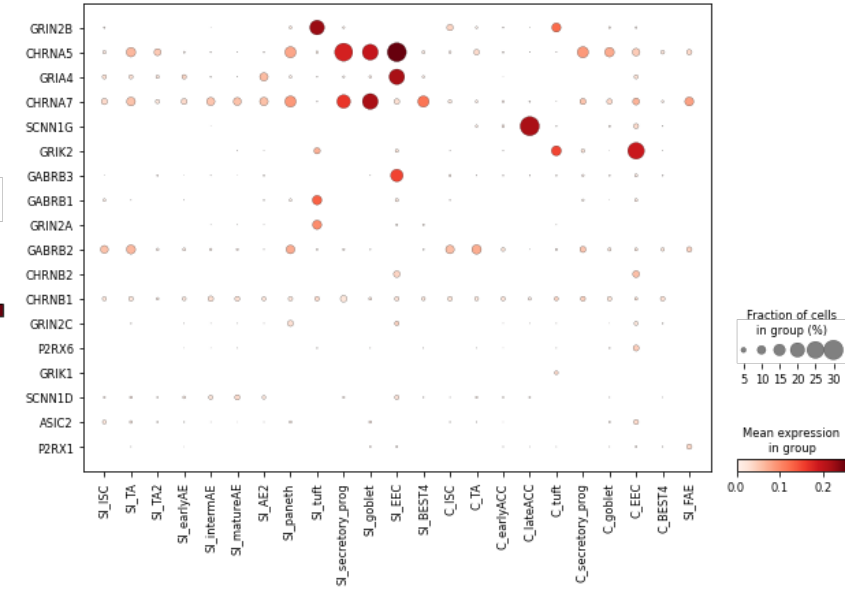

## Low Expression (<0.05)

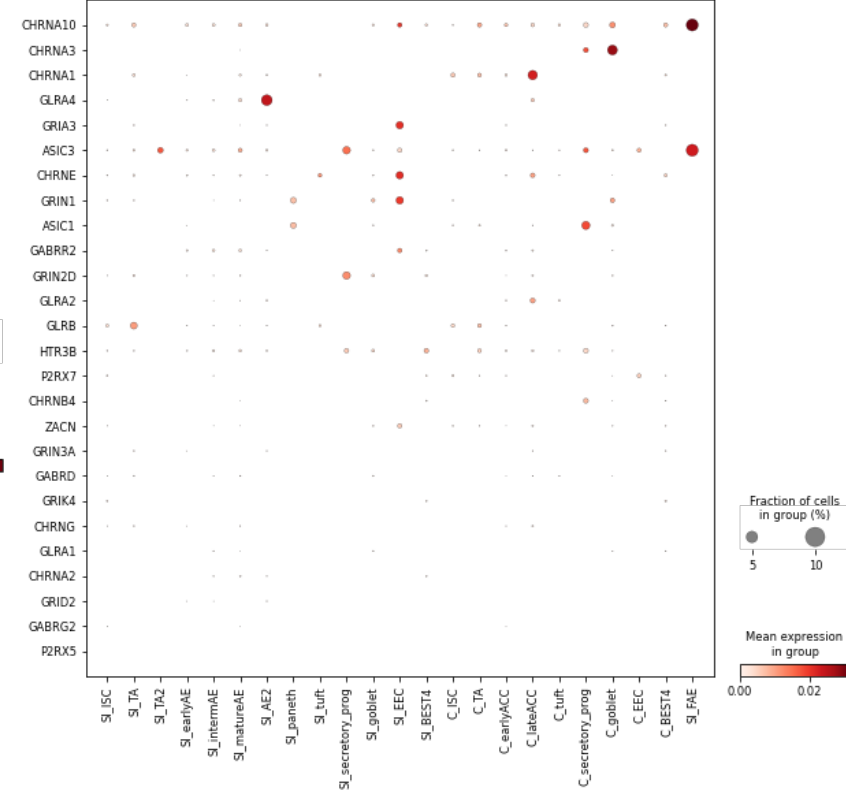

# Other Ion Channels

## High Expression (>0.5)

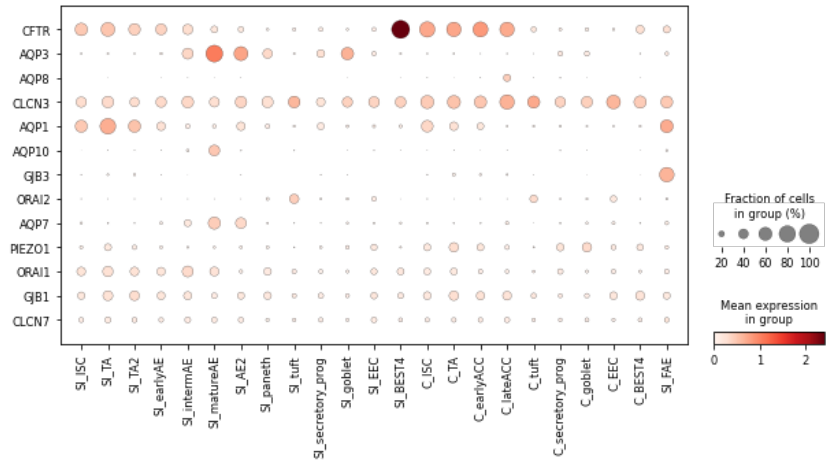

## Mid Expression (0.05 - 0.5)

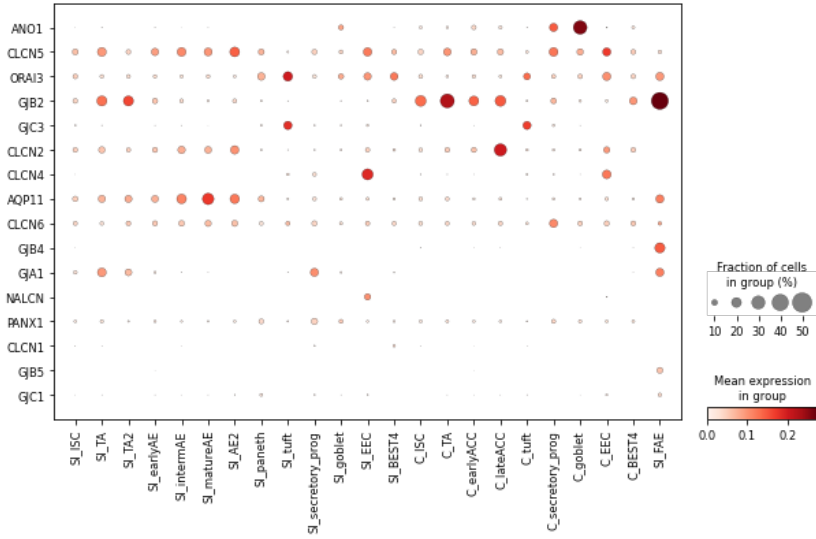

## Low Expression (<0.05)

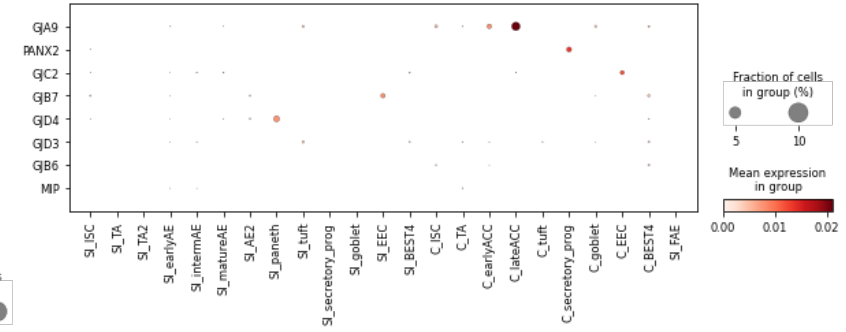

# G-Protein Coupled Receptors

## High Expression (>0.5)

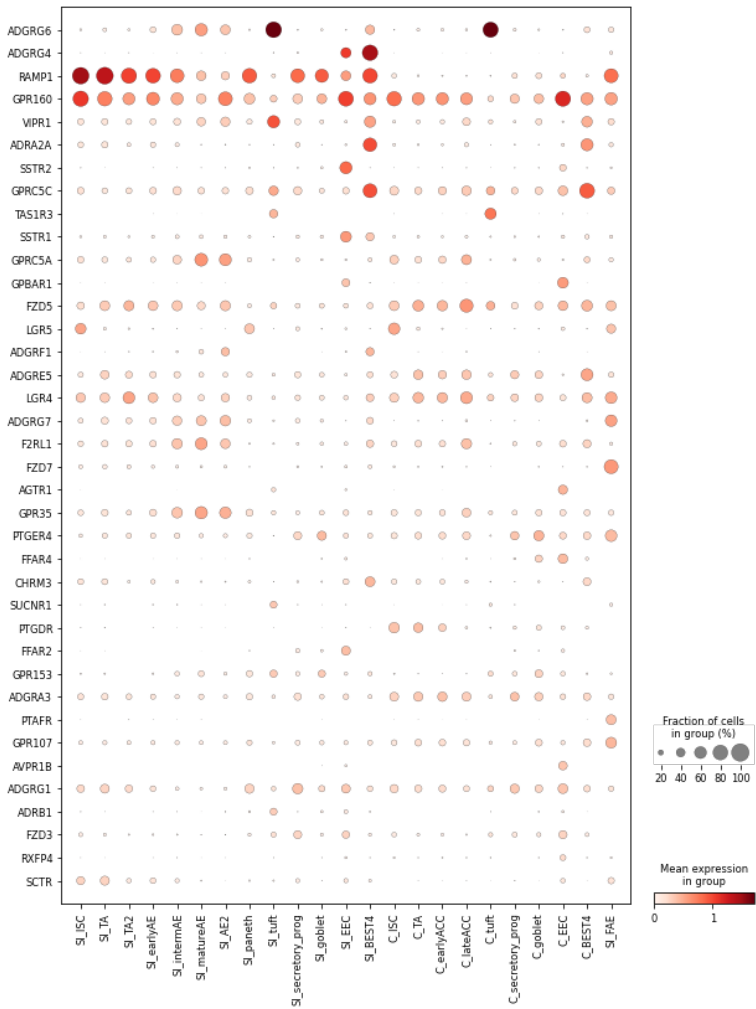

## Mid Expression (0.05 - 0.5)

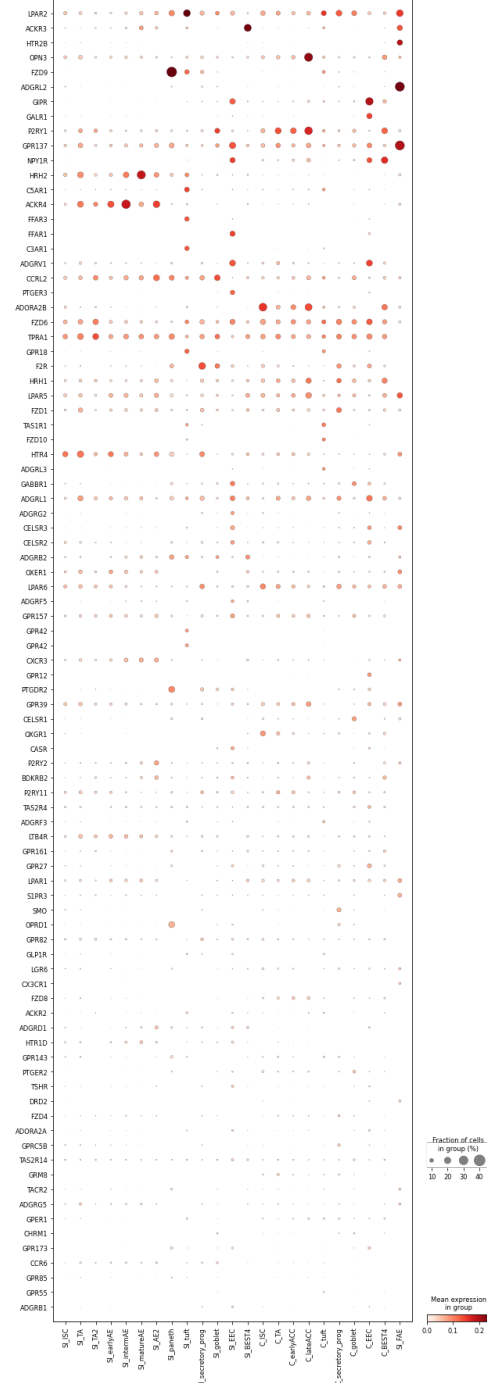

## Low Expression (<0.05)

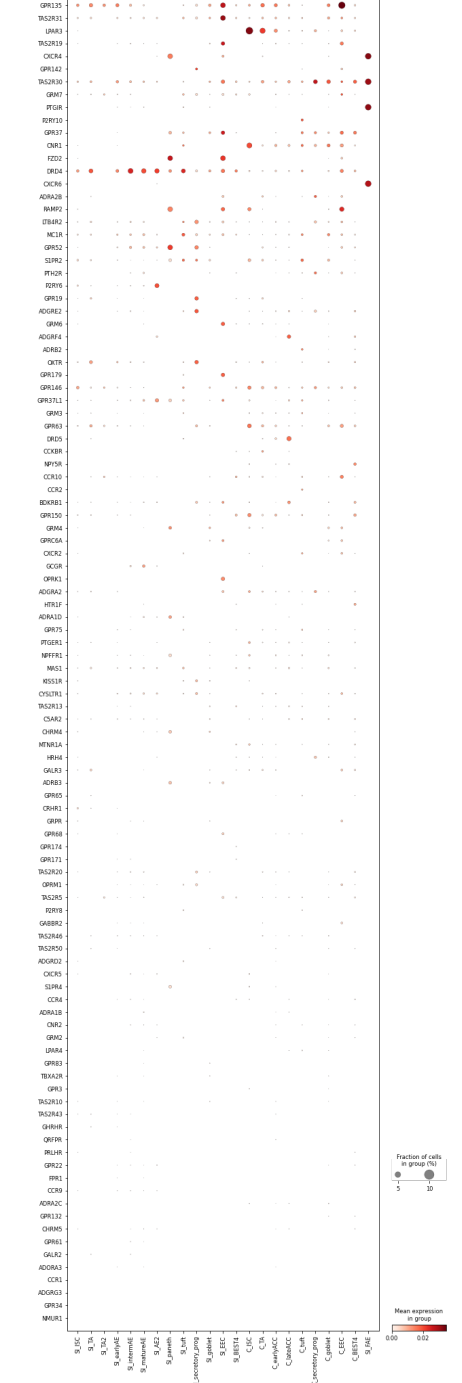

# Nuclear Hormone Receptors

## High Expression (>0.5)

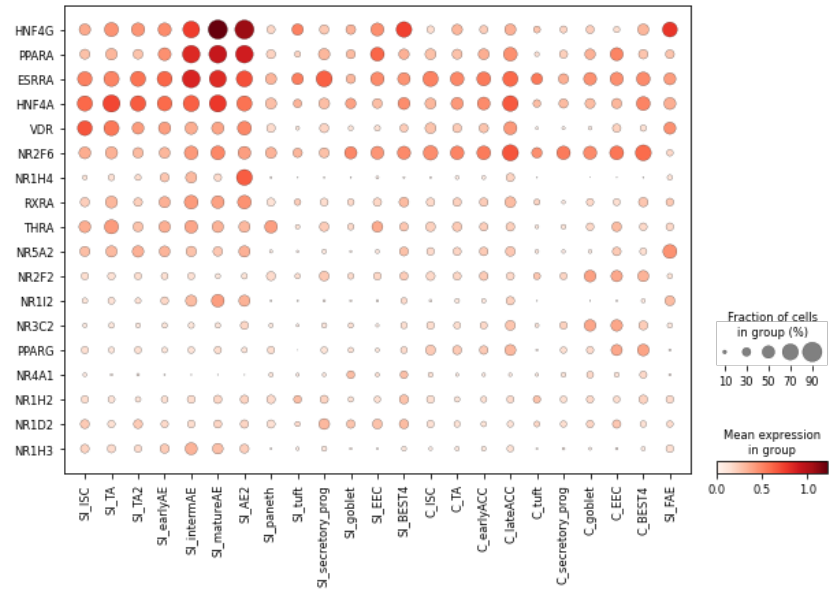

## Mid Expression (0.05 - 0.5)

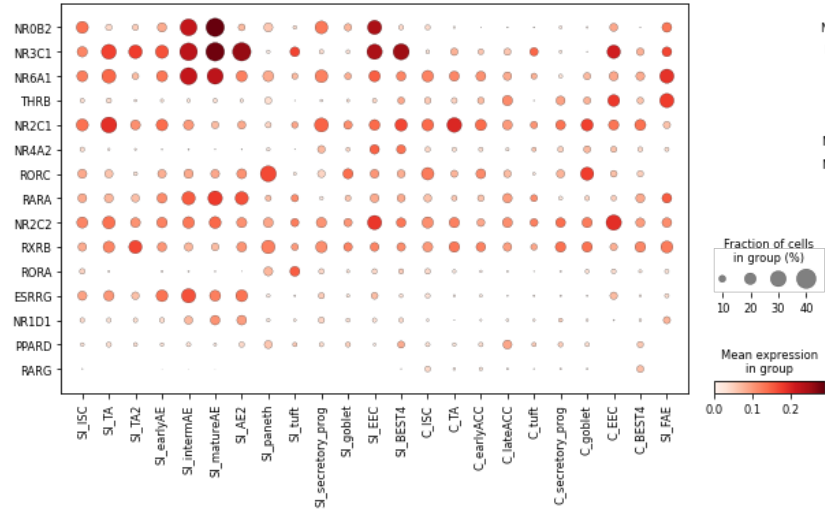

## Low Expression (<0.05)

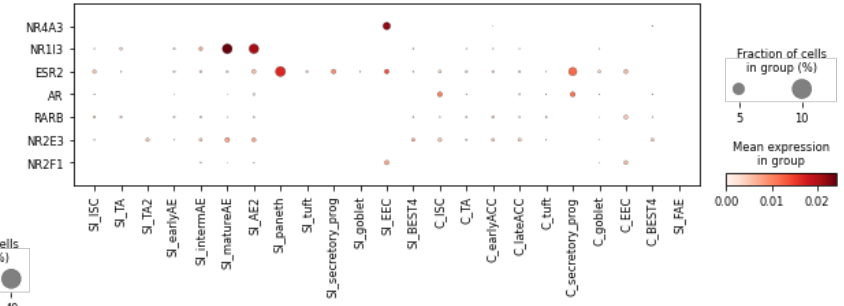

# Interleukin Receptors

## High Expression (>0.5)

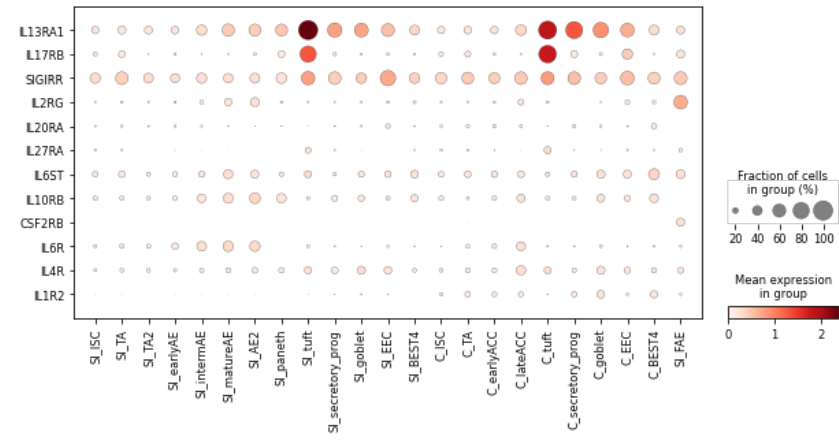

## Mid Expression (0.05 - 0.5)

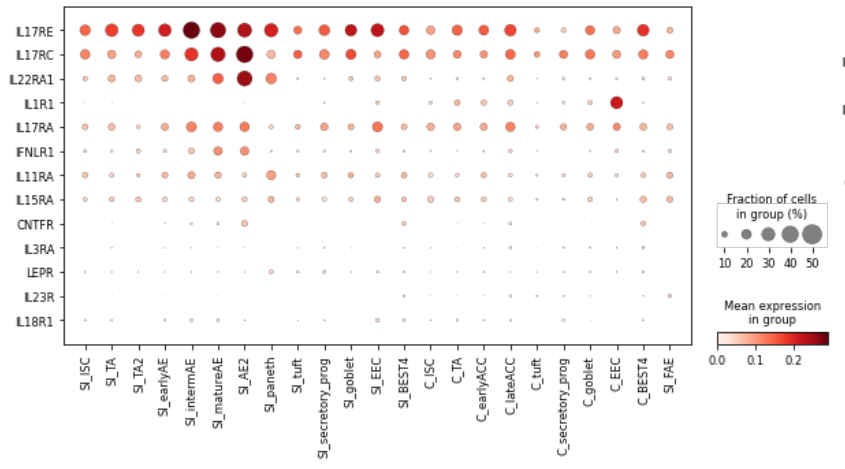

## Low Expression (<0.05)

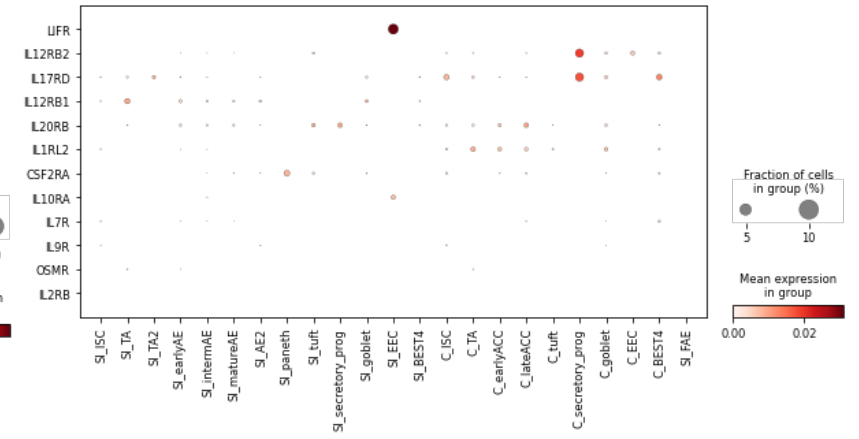

# Integrins

## High Expression (>0.5)

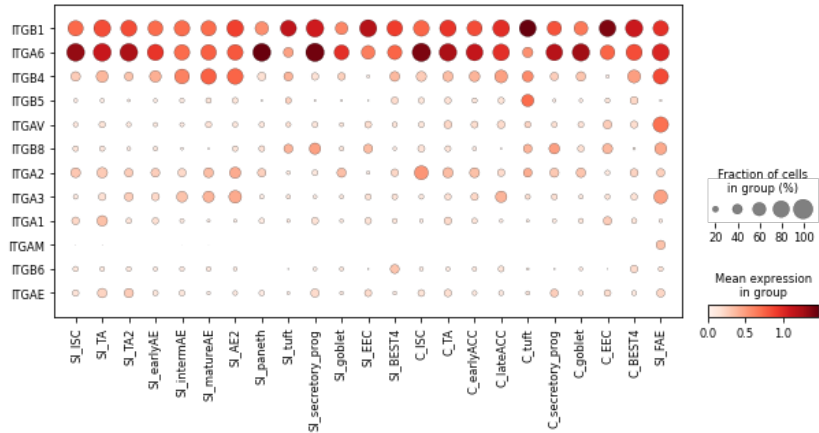

## Mid Expression (0.05 - 0.5)

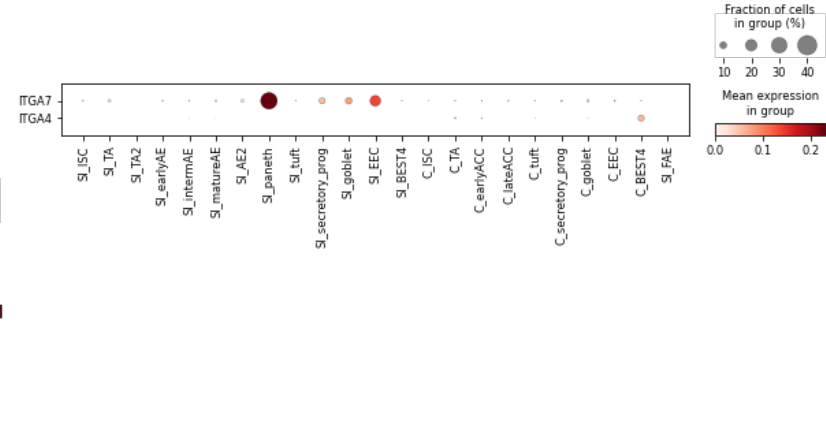

## Low Expression (<0.05)

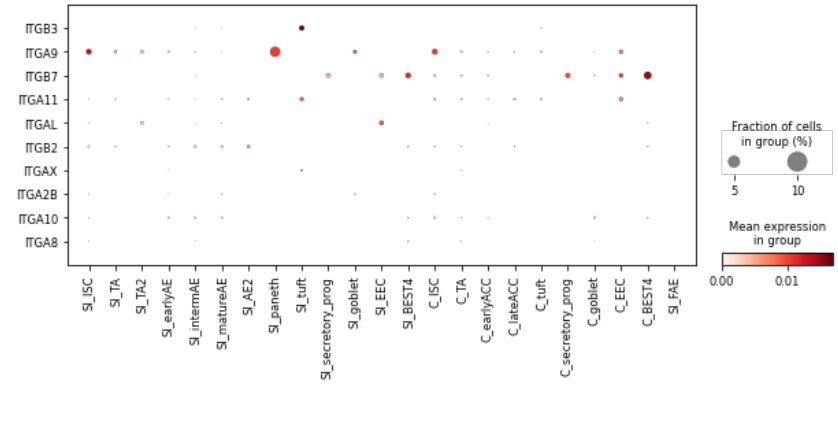



# Toll-Like Receptors

## High Expression (>0.5)

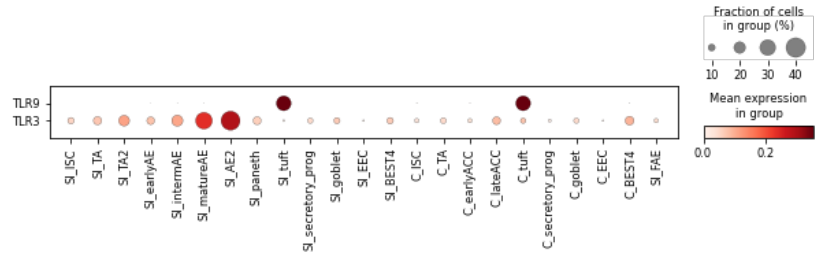

## Mid Expression (0.05 - 0.5)

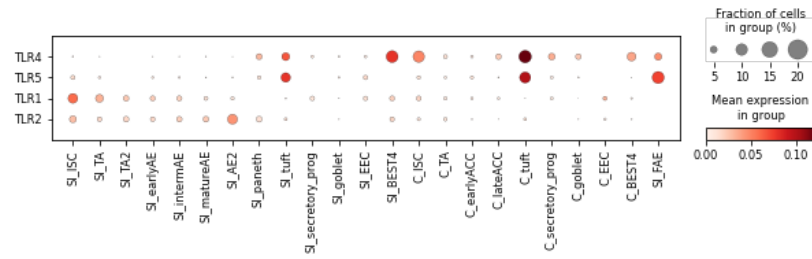

## Low Expression (<0.05)

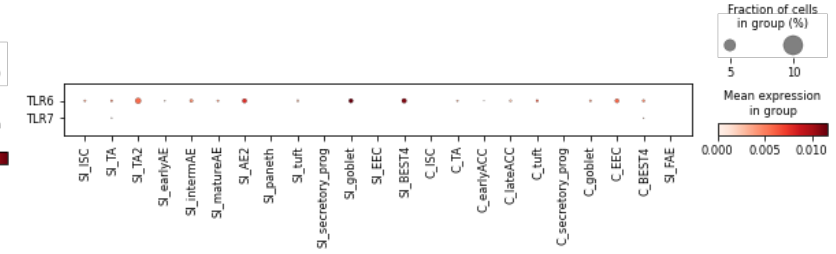

# Receptor Tyrosine Kinases

## High Expression (>0.5)

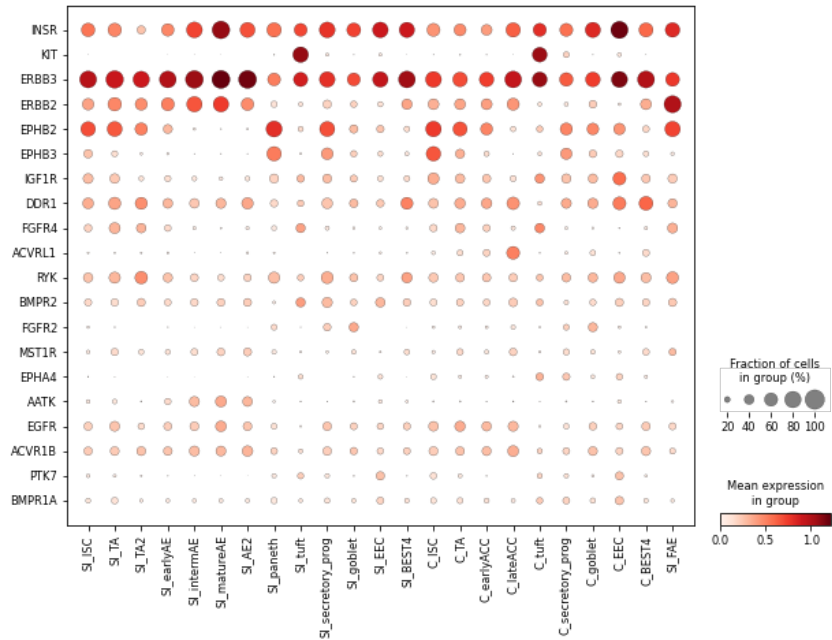

## Mid Expression (0.05 - 0.5)

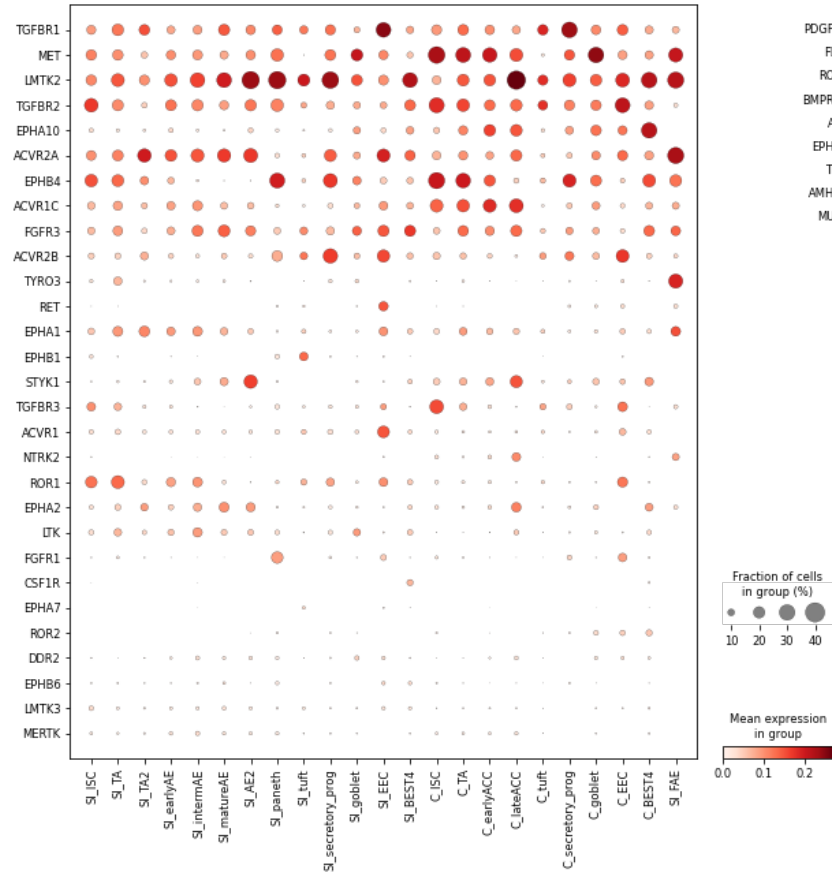

## Low Expression (<0.05)

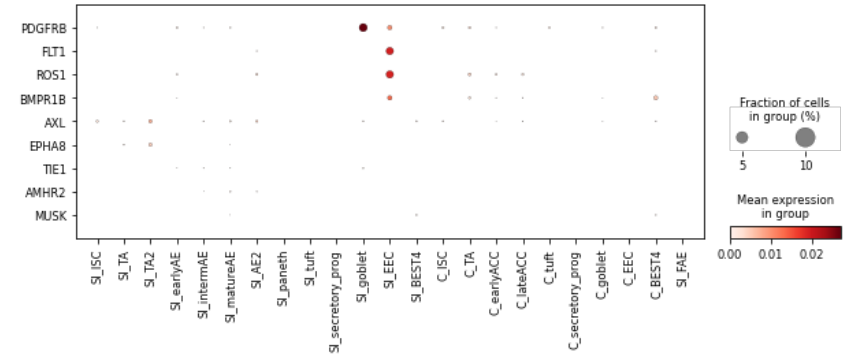

# Receptor Tyrosine Phosphatases

## High Expression (>0.5)

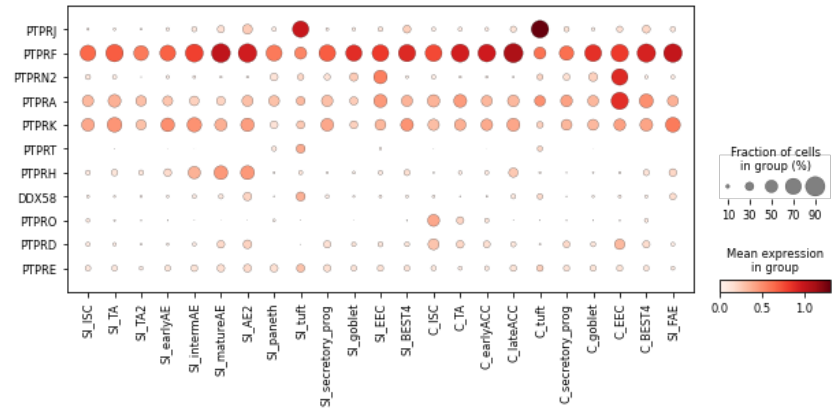

## Mid Expression (0.05 - 0.5)

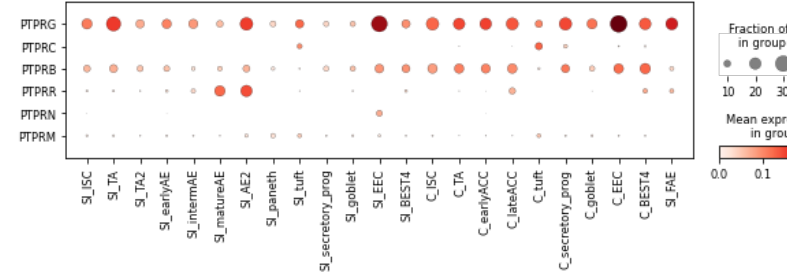

## Low Expression (<0.05)

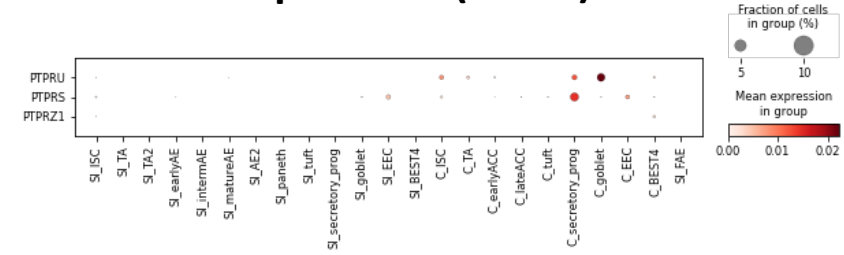

# TNF Receptors

## High Expression (>0.5)

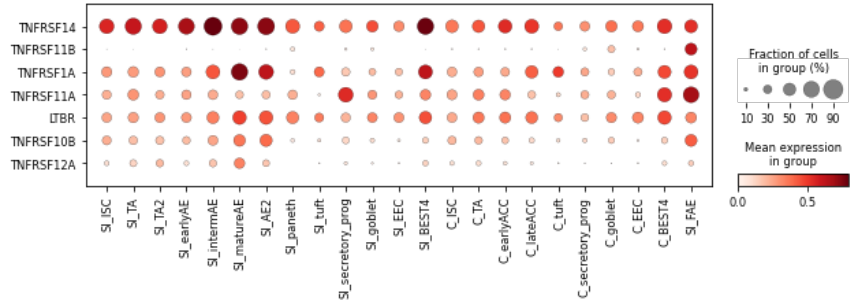

## Mid Expression (0.05 - 0.5)

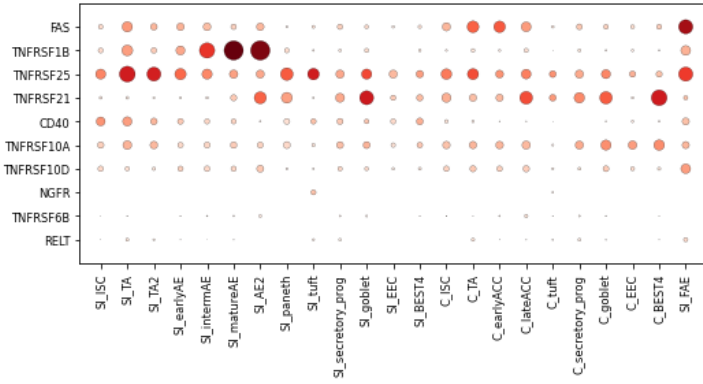

## Low Expression (<0.05)

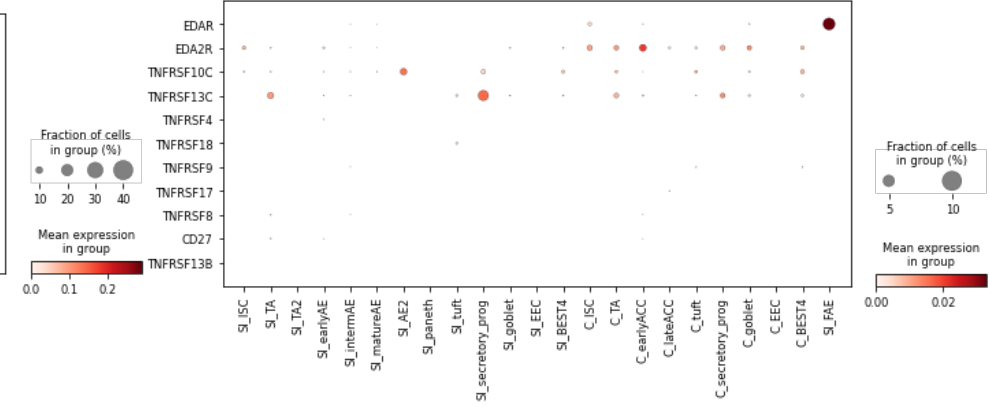

# NOD-Like Receptors

## High Expression (>0.5)

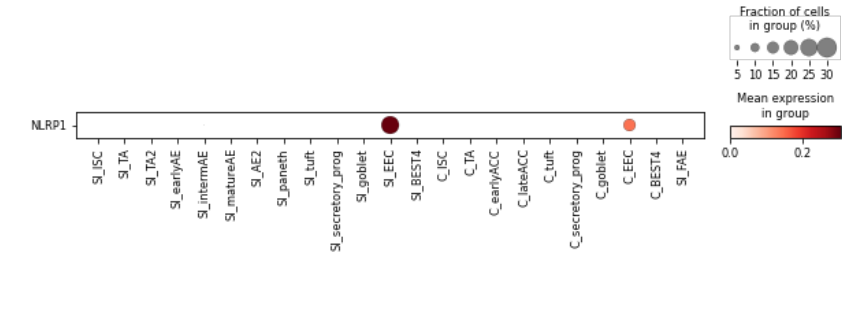

## Mid Expression (0.05 - 0.5)

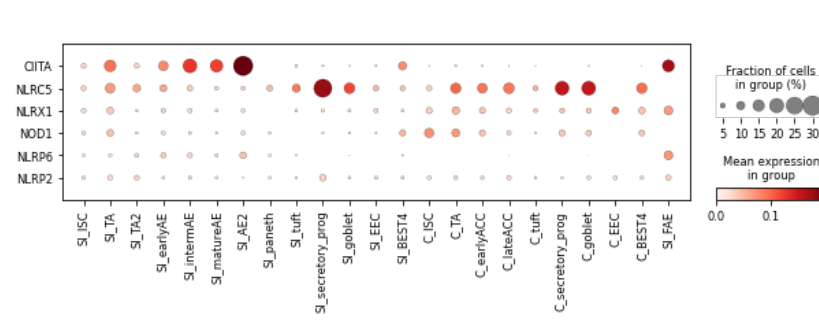

## Low Expression (<0.05)

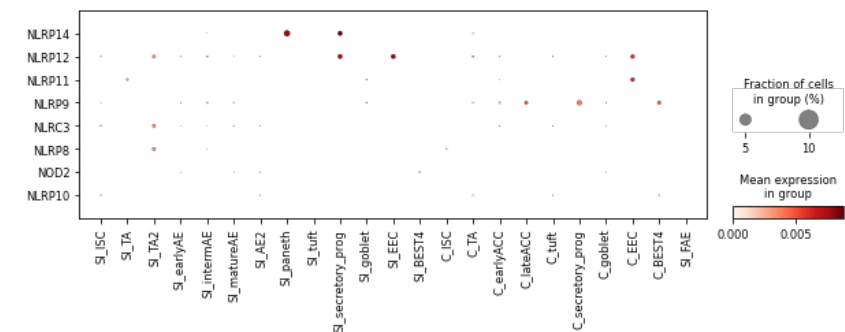

# Small Catalytic Receptor Families

## High Expression (>0.5)

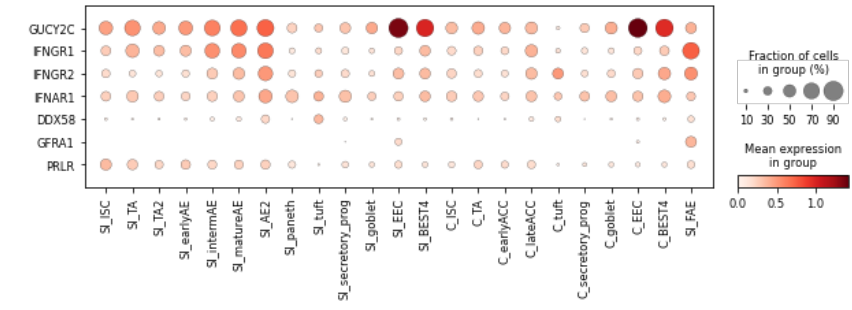

## Mid Expression (0.05 - 0.5)

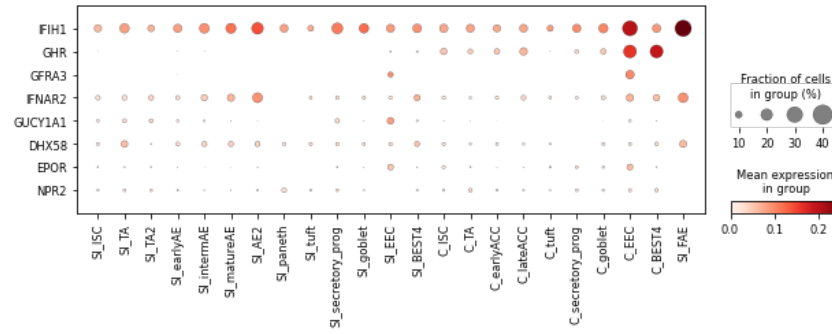

## Low Expression (<0.05)

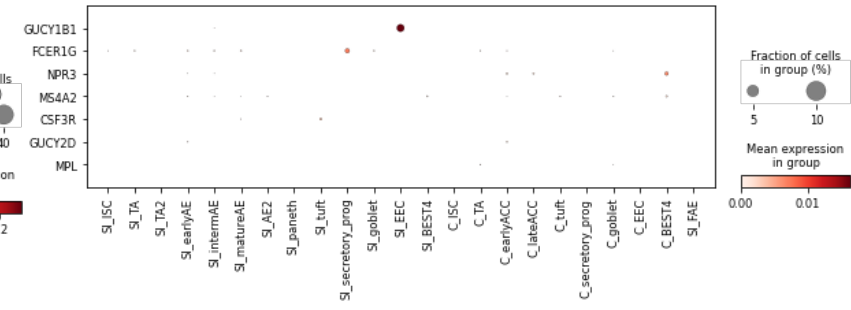

Supplement: Supplementary file [file media-7.pdf]
